# Supplementary material
Source: publisher figshare collection journal article supplement (https://karger.figshare.com/ndownloader/files/30468912)
Supplement: Supplementary file 1 [file 30468912]

**Supplementary Table 1:** Comparison of lab markers after adjustment for diagnosis, sex, age, smoking status and disease duration, independent of medication of group

| **Adjusted Parameter** | **Lab Marker** | **GMR (95% CI)** | **p-value** |
| --- | --- | --- | --- |
| Diagnosis (CD vs. UC) | CK  LDH  CRP  FCal | 1.00 (0.81; 1.25)  1.05 (0.98; 1.12)  0.62 (0.39; 0.98)  1.14 (0.64; 2.02) | 0.97  0.17  0.04*  0.67 |
| Sex (male vs. female) | CK  LDH  CRP  FCal | 1.53 (1.26; 1.87)  0.99 (0.93; 1.05)  0.92 (0.61; 1.39)  1.06 (0.63; 1.77) | <0.001*  0.72  0.69  0.83 |
| Age | CK  LDH  CRP  FCal | 1.00 (0.99; 1.01)  1.00 (1.00; 1.01)  1.01 (0.99; 1.01)  1.01 (0.99; 1.03) | 0.60  <0.001*  0.28  0.59 |
| Smoker (yes vs. no) | CK  LDH  CRP  FCal | 0.94 (0.75; 1.18)  1.01 (0.94; 1.08)  1.18 (0.73; 1.91)  1.36 (0.76; 2.45) | 0.61  0.85  0.49  0.31 |
| Smoker (ex vs. no) | CK  LDH  CRP  FCal | 0.72 (0.54; 0.95)  0.98 (0.90; 1.07)  1.78 (0.98; 3.23)  1.50 (0.71; 3.17) | 0.02*  0.64  0.06  0.29 |
| Disease duration | CK  LDH  CRP  FCal | 1.00 (0.98; 1.01)  1.00 (0.99; 1.00)  0.99 (0.97; 1.02)  1.00 (0.96; 1.03) | 0.96  0.04*  0.61  0.82 |
